1 **Running title:** Contemporary risk of extinction

2

3

4 **Contemporary risk of extinction in an extreme**

5 **environment**

6

7 Simone Vincenzi

8 Google scholar: <https://scholar.google.com/citations?user=kiV7yTQAAAAJ&hl=en>

9 ORCID ID: <https://orcid.org/0000-0002-8436-8608>

10 Email: [simon.vincenz@gmail.com](mailto:simon.vincenz@gmail.com)

11        **Abstract**

12        The increased frequency and intensity of extreme events are recognized among the  
13        most worrisome aspects of climate change. However, despite increased attention from  
14        scientists and conservationists, developing and testing general theories and hypotheses on  
15        the effects of extreme events on natural populations remains intrinsically challenging.

16        Using numerical simulations with general—but realistic for moderately fast-leaving  
17        species—parameter values, I tested some of the hypotheses on risk of extinction and  
18        population and genetic dynamics in an environment in which both climate (e.g.,  
19        temperature, rainfall) and point (e.g., fires, floods) extremes occur. In the simulations, a  
20        quantitative trait is selected for by a climate variable, but point extremes cause trait-  
21        independent massive mortalities.

22        I found additive effects between age at first reproduction and fecundity on risk of  
23        extinction. The extent of population bottlenecks (operationally, the number of years in  
24        which a population was at low numbers) was a good predictor of allelic richness for the  
25        quantitative trait selected for by the climate. Simple models including basic demographic  
26        and vital rates information of the species, along with climate/environmental measures,  
27        provided excellent predictions of contemporary risk of population extinction. Mean and  
28        minimum population size measured in a 10-year “observation window” were largely the  
29        most important predictors of risk of population extinction in the following 10-year  
30        “prediction window”.

31        **Keywords:** population dynamics, prediction, adaptation, climate change, genetics

## 32 **1 Introduction**

33 Extreme events are now recognized among the most worrisome aspects of climate  
34 change (IPCC 2007, 2012, Jentsch et al. 2007, The One Earth Editorial Team 2020).  
35 They may be defined in terms of extreme values of a continuous climate variable (e.g.,  
36 daily or mean summer temperature, rainfall) on the basis of the available climate and  
37 weather record (Gutschick and BassiriRad 2010), or in the form of a “point” (or discrete)  
38 perturbation, such as a hurricane or a storm; the latter category also includes  
39 environmental hazards such as fires and floods. Following Vincenzi (2014), throughout  
40 this work I will use the term climate extreme for extreme values of a continuous climate  
41 or environmental variable and point extremes for discrete extreme perturbations.

42 The genetic and demographic determinants of both adaptation to a more extreme  
43 environment and contemporary risk of extinction are receiving increasing interest from  
44 scientists and conservationists. Despite the increased research and management focus on  
45 extremes, developing and testing general theories and hypotheses on the effects of  
46 extreme events remains more challenging than for other aspects of climate and  
47 environmental change (van de Pol et al. 2017). Those challenges are likely to be intrinsic  
48 and unavoidable.

49 First, since the effects of extreme events are largely context-specific, developing an  
50 overarching causal and predictive framework might be overly ambitious (Bailey and van  
51 de Pol 2016). For instance, the emergence of adaptations may depend on both the life  
52 histories of the species and the recurrence interval, intensity, and nature of extreme  
53 events. Besides, the demographic and genetic effects of climate and point extremes (e.g.,  
54 population crashes, loss of genetic diversity, inbreeding and maladaptation, changes in

55 population age and size structure, disruption in the expression of quantitative traits)  
56 (Bryant and Meffert 1995, Kirkpatrick and Jarne 2000) are often the result of chance and  
57 are thus not easily predictable or generalizable across species or habitats. Second, climate  
58 and point extremes that result in strong demographic and genetic responses are often rare  
59 events, whose occurrence may be also difficult to predict. When available,  
60 pre-disturbance empirical data is likely to have been collected by chance, and the studies  
61 on the effects of extreme events prone to be mostly opportunistic and anecdotal instead of  
62 planned and comprehensive.

63 Despite the intrinsic difficulties of developing and testing general theories on the  
64 effects of climate and point extremes on natural populations, there are a few theory-based  
65 predictions on the demographic and genetic consequences of extreme events that may be  
66 quite general across species and habitats, although with varying degrees of modeling and  
67 empirical validation.

68 The first prediction is that by reducing population size, extreme events directly  
69 increase the risk of extinction of the affected populations (Willi et al. 2006, Frankham et  
70 al. 2014); mathematical modeling, empirical observations, and common sense all suggest  
71 that smaller populations are more likely to go extinct than larger populations. After the  
72 occurrence of extreme events, in some cases the extinction of the focal population is  
73 inevitable for numerical reasons (no individuals capable of reproducing survived) unless  
74 there is immigration from neighboring—either unaffected or less affected—populations  
75 (i.e., “demographic rescue”, Brown and Kodric-Brown 1977, Carlson et al. 2014).

76 Second, when the change in the environment is sudden, but not causing mass  
77 mortalities, the evolution of fitness-determining traits might occur fast enough to stop

78 population decline and allow population recovery before extinction (“evolutionary  
79 rescue”, Bell and Gonzalez 2009). However, population bottlenecks such as those caused  
80 by extreme events, especially when repeated over time, are predicted to decrease additive  
81 genetic variance and allelic diversity in the affected populations (Bouzat 2010). As  
82 adaptive potential tends to increase with genetic variability and genetic drift may  
83 overwhelm selection in small populations, the effects of extreme events on genetic  
84 variability are predicted to increase both the short- and long-term risks of population  
85 extinction, with smaller chances of evolutionary rescue (Falconer and Mackay 1996,  
86 Willi and Hoffmann 2009).

87 Third, species may exhibit various adaptations to extreme events, some more  
88 predictable and general than others. For instance, extreme, but predictable variations in  
89 the flow regime of streams can select for fish life histories, such as spawning and  
90 emergence time, that are synchronized either to avoid or exploit the direct (e.g., stronger  
91 or weaker currents) and indirect (e.g., changes in food webs) effects of extreme flows  
92 (Lytle and Poff 2004). On the contrary, unpredictable flow events such as flash floods  
93 may have low direct selective consequences for the affected populations, even though  
94 they might induce massive mortalities (Lytle 2000). In these cases, natural selection after  
95 the extreme event is predicted to favor individuals with a high capacity for increase in  
96 population size (*r* selection, Reznick et al. 2002). Intuitively, when after an extreme event  
97 the population is reduced to a few individuals, faster reproduction may be more critically  
98 needed than high fecundity, since the latter depends on being able to reproduce.  
99 However, the interaction effects between age at first reproduction and fecundity on risk  
100 of extinction in an extreme environment have been rarely investigated.

101 In this work, I test using a simulation approach some of the hypotheses on risk of  
102 extinction and population and genetic dynamics in an environment in which both climate  
103 and point extremes occur. In previous work, Vincenzi (2014) found that the survival  
104 chances of a population were found to decrease with increasing strength of selection, as  
105 well as with increasing climate trend (e.g., increasing or decreasing  $n$ -year moving  
106 average temperature, rainfall) and variability. They also found that the interactions  
107 among climate trend (e.g., increase over years of average summer temperatures), climate  
108 variability and probability of point extremes (e.g., fires) had negligible effects on risk of  
109 extinction, time to extinction, and distribution of a quantitative trait selected for by  
110 climate after accounting for their independent effects.

111 The present work focuses more on prediction than inference; prediction of future  
112 observables has long been included as an aspect of biological and ecological studies, but  
113 as a methodological approach it has been much less prominent than either description or  
114 statistical and causal inference. The work is also not purely theoretical in scope, but is  
115 motivated (and model parameter values inspired) by the study of the population and  
116 genetic dynamics, and risk of extinction of marble trout *Salmo marmoratus* living in  
117 Slovenian streams (Vincenzi et al. 2016). Marble trout populations are affected by flash  
118 floods in autumn and droughts in summer, and the climate threat to the persistence of  
119 marble trout is likely to worsen with climate change; for instance, the increase in intra-  
120 annual variability in rainfall is predicted to increase the frequency of flash floods (Janža  
121 2013). However, since there is a need for more general investigations of risk of  
122 population extinction and population and genetic dynamics in presence of climate and

123 point extremes, I developed a more widely applicable modeling and conceptual  
124 framework.

125 I modeled an idealized situation of additive genes, a closed population of moderate  
126 size with random mating, and variable across simulations—but fixed within  
127 simulations—age at first reproduction and expected number of offspring per mating pair,  
128 climate trend and variability (i.e., the parameters of the distribution of climate variable  
129 that is selecting for a quantitative trait), selection strength, and frequency and severity of  
130 point extremes. I assume that point extremes cause massive mortalities, but no trait other  
131 than good fortune increases the survival chances of an individual when point extremes  
132 occur.

133 First, I tested whether in an extreme environment the extent of population bottlenecks,  
134 which I operationally defined as the total number of years with “depressed” population  
135 size (e.g.,  $\sim 1/3$  to  $\sim 1/10$  of the habitat carrying capacity), could help predict allelic  
136 richness at the end of simulation time for the quantitative trait selected for by the climate  
137 variable. Second, I tested whether quantitative trait adaptation was correlated with the  
138 increased frequency of theoretically advantageous alleles (i.e., their allelic values are in  
139 the same direction of the change in the environment) and whether the genetic dynamics  
140 of the populations could be predicted using information on the climate and on the  
141 population life histories. Third, I tested for interaction effects between age at  
142 reproduction and fecundity on risk of population extinction. Finally, I tested whether it is  
143 possible to predict the extinction or survival of a population in a 10-year “prediction  
144 window” (i.e., contemporary extinction) when measuring or observing some of the  
145 environmental characteristics of the habitat (e.g., occurrence of extreme events) and of

146 the population (e.g., population size, age at reproduction) during a 10-year “observation  
147 window” that immediately precedes the “prediction window”.

## 148 **2 Material and methods**

149 The model I use in this work is an extension of the model developed in Vincenzi  
150 (2014). The choice of parameter values for the present work was informed by the  
151 available literature on extreme events, population monitoring, and species life histories,  
152 and by the results of Vincenzi (2014).

### 153 **2.1 Overview of the model**

154 I consider a population of monoecious individuals living in a habitat whose population  
155 ceiling is  $K$  (Mangel and Tier 1993). The population is geographically isolated, with  
156 neither immigration nor emigration from or to other populations. A single quantitative  
157 trait  $a$  corresponding to its breeding value for a phenotypic trait  $z$  characterizes the  
158 individuals. The population has discrete overlapping generations with  $N(t)$  total  
159 individuals, where  $t$  is time in years. The environment is described by an optimum  
160 phenotype  $\Theta(t)$  that changes over time as a result from variations in a climate driver such  
161 as rainfall or average summer temperature, which selects for the trait  $z$ . The distance  
162 between the optimum phenotype  $\Theta(t)$  and the trait  $z_i$ ,  $(\Theta(t) - z_i)$  of the individual  $i$  defines  
163 the maladaptation of the individual  $i$  with respect to the optimum phenotype (or,  
164 alternatively, it defines the “extremeness” of the climate event for the individual). Point  
165 extreme events such as floods or fires cause non-selective high mortality in the  
166 population, i.e. every phenotype has the same chances of surviving the event.



## 167            2.2 Optimum phenotype

168            The expected optimum phenotype  $\mu_{\Theta}(t)$  moves at a constant rate  $\beta_{\mu,\Theta}$  over time (i.e.,  
169 trend), fluctuating randomly around its expected value  $\mu_{\Theta}(t)$ . The optimum phenotype  
170  $\Theta(t)$  is randomly drawn at each time step  $t$  from a normal distribution  $\Theta(t) \sim N$   
171  $(\mu_{\Theta}(t), \sigma_{\Theta}(t))$ . It is equivalent to consider  $\Theta(t)$  as both the optimum phenotype and the  
172 value of a continuous climate variable (e.g., mean summer temperature or yearly rainfall),  
173 and I will use the two terms interchangeably throughout this work.

174            Mean and variance of the climate variable at time  $t$  are thus:

175

$$\begin{cases} \mu_{\Theta}(t) = \mu_{\Theta,0} & \text{when } t < t_{ch} \\ \mu_{\Theta}(t) = \mu_{\Theta,0} + \beta_{\mu,\Theta}(t - t_{ch}) & \text{when } t \geq t_{ch} \end{cases} \quad (1)$$

179

$$\begin{cases} \sigma_{\Theta}(t) = \sigma_{\Theta,0} & \text{when } t < t_{ch} \\ \sigma_{\Theta}(t) = \sigma_{\Theta,0} + \beta_{\sigma,\Theta}(t - t_{ch}) & \text{when } t_{ch} \leq t \leq (t_{ch} + t_{inc}) \\ \sigma_{\Theta}(t) = \sigma_{\Theta,0} + \beta_{\sigma,\Theta} t_{inc} & \text{when } t > (t_{ch} + t_{inc}) \end{cases}$$

182

183            where  $t_{ch}$  is the time at which there is a change (*ch*) in the climate. Eq. (1)

184 indicates that the directional climate trend steadily increases through time after  $t_{ch}$  years

185 and that the increase in variability starts after  $t_{ch}$  years, but stops after  $t_{ch} + t_{inc}$  years. An

186 alternative formulation to Eq. (1) would allow variability to more slowly build up over

187 time; however, in the case of variability slowly increasing over longer times, the effects

188 of higher climate variability would affect the individuals only towards the end of

189 simulation time. As informed by the goals of this work, I preferred to let individuals

190 trying to survive a higher climate variability (which is among the least investigated  
191 aspects of climate and environmental change) for a longer time period.

192 With the model formulation of Eq. (1), both the mean and variance of the distribution  
193 of the climate variable change over time so as to make the occurrence of events more  
194 likely after climate change (i.e.,  $t > t_{ch}$ ) than before, since after climate change, the  
195 realized (i.e., random draw from the statistical distribution of climate) climate is  
196 increasingly likely to be in the region of extremes (say, in the right 5% or 2.5% of the  
197 Gaussian distribution of climate) of the statistical distribution of climate before climate  
198 change.

199 Point extreme events  $E$  leading to trait-independent high mortalities occur with annual  
200 probability  $p(E_b)$  when  $t < t_{ch}$  (i.e. b - before climate change) and  $p(E_a)$  when  $t > t_{ch}$ .

### 201 **2.3 Quantitative trait and survival**

202 I model the phenotype  $z$  of an individual  $i$ ,  $z_i$ , as the sum of its genotypic value  $a_i$  and a  
203 statistically-independent random environmental effect  $e_i$  drawn from  $\mathcal{N}(\mu_E, \sigma_E^2)$ :

$$204 \quad z_i = a_i + e_i \quad (2)$$

205 The narrow sense heritability  $h^2 = \sigma_G^2 / \sigma_z^2$  is the proportion of the phenotypic variance  
206  $\sigma_z^2$  present in the population that is explained by the additive genetic variance  $\sigma_G^2$  (i.e.  
207 the variance of  $\mathbf{a}$  in the population).

208 For an individual  $i$ , the genetic value  $a_i$  is determined by  $n_l$  freely recombining diploid

209 loci, with additive allelic effects within- and among-loci, that is  $a_i = \sum_{j=1}^l n_{i,j}$ , where  $n_{i,j}$

210 is the sum of the allelic values at locus  $j$ . For computational reasons, I chose  $n_l = 10$ .

211 Allelic values are randomly drawn from a Gaussian distribution with mean of 0 and

212 variance equal to  $\sigma_a^2$ . For simplicity, I did not model either dominance or epistatic  
213 variation or other complicating factors such as genotype-environment interaction and  
214 linkages. Likewise, I did not model mutation, since previous work has shown that  
215 mutation does not appear to have any effect short-term on extinction risk and the  
216 evolution of traits on contemporary temporal scales (Vincenzi 2014).

217 Stabilizing selection is modeled with a Gaussian function (Bürger and Lynch 1995,  
218 Zhang 2012), with fitness  $W$  (Endler 1986) for an individual with phenotypic trait  $z_i$  equal  
219 to:

$$220 \quad W(t, z_i) = W(t)_i = \exp \left[ -\frac{(z_i - \Theta(t))^2}{2\omega^2} \right] \quad (3)$$

221 and equivalent in this model to the annual survival probability of individual  $i$ . The  
222 curvature of the fitness function near its optimum increases with decreasing  $\omega^2$ ; it follows  
223 that that the smaller  $\omega^2$ , the stronger is selection. Stabilizing selection is usually measured  
224 by the standardized quadratic selection gradient  $\gamma$ , which is defined as the regression of  
225 fitness  $W$  on the squared deviation of trait value from the mean (Lynch and Walsh 1998).  
226 An optimum phenotype in the tails of the distribution is likely to cause a large drop in  
227 population size and can be considered an extreme climate event (Fig. 1).

228 The median  $\gamma = -0.1$  for stabilizing selection found by Kingsolver et al. (2001)  
229 corresponds to a value of  $\omega^2 / \sigma_E^2 = 5 / [1 - h^2]$ , where  $\sigma_E^2$  is the variance of the  
230 environmental component of the phenotype defined in Eq. (2), when stabilizing selection  
231 is modeled using a Gaussian fitness function.

232 Eq. (3) can be written:

233 
$$W_i = \exp\left[-s \cdot (z_i - \Theta(t))^2\right] \quad (4)$$

234 where  $s = \frac{1}{2\omega^2}$ . With  $\gamma = -0.1$ ,  $\sigma_E^2 = 1$ , and  $h^2 = 0.2$ , the strength of selection  $s$  is

235 about 0.08.

236 I assumed that both strength of selection  $s$  and environmental variance  $\sigma_E^2$  remain  
237 constant through time. When a point extreme occurs, the probability of yearly survival of  
238 individuals  $i$  is  $W_i(1 - m_{E_i})$ , where  $m_{E_i}$  is mortality caused by the point extreme event.

## 239 **2.4 Simulations**

240 As this study focuses on the more immediate effects of climate change, the  
241 simulations last 250 years. Parents mate at time  $t-1$ , offspring are born at time  $t$  and  
242 become of age 1 at  $t+1$ . The sequence of operations is mortality of adults, mating and  
243 reproduction, mutation, mortality of offspring. At the start of each simulation, for each  
244 individual a value of  $a$  and  $e$  (Eq. 2) is randomly drawn from their initial distribution. A  
245 population is considered extinct if at any time during the simulation there are fewer than  
246 2 individuals in the population. Parents form mating pairs starting at age  $a_f$  and produce a  
247 number of offspring randomly drawn from a Poisson distribution with intensity  $\lambda_o$ .  
248 Offspring receive for the same locus one allele from each parent.

### 249 **2.4.1 Parameter values**

250 With numerical simulations, it is inevitable to face a trade-off between specificity and  
251 generalizability of the modeled processes and of the simulation results. I reduced  
252 parameter space by fixing  $K = 500$  individuals,  $\mu_{\Theta,1} = 0$ ,  $\sigma_{\Theta,1} = 1$ ,  $\mu_E = 0$ ,  $\sigma_E^2 = 1$ ,  $\sigma_G^2 = 2$   
253  $10^{-1}$ ,  $\sigma_a = 5 \cdot 10^{-2}$ ,  $p(E_{l,b}) = 0.05$ , and  $t_{inc} = 25$ . For the other parameters, I chose range of

254 values that are both realistic for natural populations with moderately fast life histories,  
255 like salmonids (e.g., age distribution skewed toward individuals younger than 10 years  
256 old, sexual maturity reached when individuals are between 1 and 4 years old), and  
257 instrumental for the main goal of the study, e.g., testing hypotheses on the effects of  
258 extreme events on population and genetic dynamics and on risk of extinction.

259 I performed simulations with selection strength  $s$  equal to either  $8 \cdot 10^{-2}$  (average  
260 selection strength) or  $1.1 \cdot 10^{-2}$  (moderately strong selection). For the rate of increase in the  
261 mean of the climate variable, I used  $\beta_{\mu,\Theta} = 0$  (base scenario) and  $1.5 \cdot 10^{-2}$ . I used rates of  
262 the increase in the standard deviation of the climate variable  $\beta_{\sigma,\Theta}$  from 0 (base scenario)  
263 to  $1.5 \cdot 10^{-2}$ . According to Bürger and Lynch (1995), when the standard deviation of the  
264 distribution of the optimum  $\sigma_\theta$  reaches the same order of magnitude as the width  $\omega$  of the  
265 fitness function, the population is at risk of going suddenly extinct, with little role played  
266 by genetics. Therefore, I chose values of  $\beta_{\sigma,\Theta}$  that strongly increase the probability of  
267 climate extremes, but did not inevitably make the population go extinct.

268 I used frequency of point extreme events  $p(E_a)$  of either  $5 \cdot 10^{-2}$  (no variation before and  
269 after climate change, corresponding to a recurrence interval of 20 years),  $10 \cdot 10^{-2}$  (i.e.,  
270 recurrence interval is 10 years) or  $15 \cdot 10^{-2}$  (Table 1). I used moderate mortalities caused  
271 by point extremes (simulations with  $m_E$  equal to either 0.3, 0.5, 0.7) and moderate  $p(E_a)$ ,  
272 since with higher mortality induced by point extremes and higher probability of their  
273 occurrence the system will be largely driven by the point extremes, with no or little role  
274 of genetics and demography in determining population dynamics and risk of extinction.

275 For the Poisson distribution of the yearly number of offspring per mating pair, I used  
276  $\lambda_o$  equal to either 1.0, 1.5, 2.0 or 2.5 and age at first reproduction from 1 to 4 years old  
277 with a step of 1. Parameter values are reported in Table 1.

#### 278 **2.4.2 Initialization**

279 To reach mutation-selection-drift balance, I first let the population evolve for  $t_{ch}$  years  
280 in an environment in which mean and variance of the distribution of the optimal  
281 phenotype  $\theta$  are constant. In preliminary simulations it was found that after  $t_{ch} \sim 100$   
282 years both phenotypic mean and variance did not noticeably change. Then, the mean of  
283  $\theta$  increases for 150 years and the variance of  $\theta$  for 25 years, which was then kept  
284 constant up to the end of simulation time.

285 I started every simulation replicate with 500 individuals. I modeled 10 alleles present  
286 in the population for each locus, which value was randomly drawn from a normal  
287 distribution  $N(0, \sigma_A^2)$ . Since I set  $\sigma_E^2 = 1$  and  $\sigma_G^2 = 0.2$ , the narrow sense heritability  $h^2$   
288 was around 0.2 at  $t = 1$ , close to what commonly observed for life-history traits (Lynch  
289 and Walsh 1998) and consistent with the Gaussian allelic approximation including only  
290 quasi-neutral and adaptive mutations, for which  $\sigma_G^2 = 0.225\sigma_E^2$  (Lande 1995).

#### 291 **2.4.3 Characterization of simulations**

292 At the single-replicate level, to characterize the behavior of the simulated populations  
293 I tracked or recorded (among other results): (a) whether the population was extinct or still  
294 persisting at the end of the simulation time (0 for persistence and 1 for extinction, in the  
295 latter case I also recorded the year of extinction). At each time  $t$ , I then recorded: (b) the  
296 distribution of the trait  $z$  in the population and individual maladaptation; (c) population

297 size  $N$  after mortality of adults; ( $d$ ) total number of alleles and allelic frequencies (the  
298 latter every 25 years).

299 For an ensemble of realizations (10 replicates for a fixed set of parameters) I also  
300 computed the frequency of population extinction as the number of replicates in which the  
301 population went below two individuals during simulation time.

## 302 **2.5 Statistical analysis**

303 I used simulation results as pseudo-empirical data and analyzed them with standard  
304 statistical and machine learning models. The main focus of the statistical analyses and  
305 modeling was more on prediction than on inference or traditional  $p$ -value  
306 hypothesis-testing.

307 I estimated parameters of Generalized Additive Models (GAMs, Wood 2006),  
308 Generalized Linear Models (or Ordinary Least-Square regression models, McCullagh and  
309 Nelder 1989), and Random Forests (Breiman 2001a) using as response variable either ( $i$ )  
310 the total number of alleles (overall allelic richness) at the end of simulation time for the  
311 populations that persisted, ( $ii$ ) the difference in mean allelic frequency of the top 10% and  
312 bottom 10% (according to their allelic value, top 10% were the alleles with the bigger  
313 allelic value and *vice versa* for the bottom 10%) of alleles. For ( $i$ ), in particular, I tested  
314 whether the number of consecutive years ( $n_{low}$ , the only variable in the GAM models  
315 for which I hypothesized a non-linear effect on the total number of alleles) under a low  
316 population size threshold ( $tr_{low}$ ) contributed to predicting the number of alleles at the  
317 end of simulation time, in addition to climate variables and vital rates such as expected  
318 intensity and frequency of extreme events, the variance of the optimum, expected yearly  
319 number of offspring per mating pair and age at first reproduction. I calculated  $tr_{low}$

320 using either 150, 100, or 50 individuals as the threshold (results were consistent when  
321 using either 150,100, or 50 individuals). For (ii), when the climate is changing (i.e.,  $\beta_{\mu,\theta}$   
322  $> 0$ ), alleles with positive allelic values are expected to be more adaptive than those with  
323 negative (or positive, but smaller) allelic values. I tested whether a model including  
324 climate variables and vital rates trained on data from 80% of the replicates that did not go  
325 extinct could predict the difference in mean allelic frequency at year 250 (end of  
326 simulation time) of the top and bottom 10% of alleles according to their allelic values in  
327 the test data set (20% replicates that did not go extinct). I chose the top and bottom 10%  
328 of the alleles (10 alleles in the top and bottom sets), since the fate of single alleles is more  
329 likely to be affected by chance than that of a group of advantageous alleles.

330 Then, I investigated whether a combination of demographic and environmental factors  
331 measured or estimated in a short time window (“observation window”) can predict the  
332 risk of extinction of the population in the following years (“prediction window”). First, I  
333 set aside a balanced test data set of simulation replicates (50% that went extinct and 50%  
334 that survived)—these simulations were not used in any phase of either model  
335 development or model training. Second, since the number of simulations that went extinct  
336 was approximately one-third of the number of those that survived, I augmented the data  
337 set by replicating 3 times the simulations that went extinct and were not included in the  
338 test data set.

339 Third, I fitted GLMs and GAMs with binomial error distribution (i.e., logistic  
340 regression), and classification Random Forests (RFs) with population extinction (1) or  
341 persistence (0) between ( $t_{\text{ext}} - u$ ) as response variable, where  $t_{\text{ext}}$  is either (a) the time at  
342 extinction for the replicate that went extinct, or (b) a random deviate from a uniform



343 distribution bounded between 20 and 250 for the replicates that survived;  $u$  is a random  
344 deviate from a uniform distribution bounded between 1 and 10 years. This way, I am  
345 trying to model extinction or persistence not at a specific time, but in a “prediction  
346 window” of 10 years, whose beginning lays between year 10 and year 240 of simulation  
347 time. I used as candidate predictors, as measured in the 10 years (“observation window”)  
348 before the “prediction window”, minimum and mean population size  $N$ , the maximum  
349 value of the optimum phenotype, the expected yearly number of offspring per mating  
350 pair, age at first reproduction, and maximum and mean distance over the observation  
351 window between the mean phenotype and the optimum (i.e., maximum and mean  
352 population-level maladaptation, or maximum and mean “extremeness” of the climate).

353 In other words, I wanted to test whether a model including climate and population  
354 traits measured over a limited time frame could predict the extinction or persistence of  
355 the population in the years immediately following the end of the “observation window”.  
356 The choice of the length of both the observation and prediction windows was based on  
357 what it is considered a “reasonable” length of population monitoring when the goal is to  
358 detect changes in population size and estimate the risk of population extinction. White  
359 (2019) collected the time series of population size of 822 populations of vertebrate  
360 species and found that 72% of time series required at least 10 years of continuous  
361 monitoring to achieve a high level of statistical power to detect significant trends in  
362 abundance (the code associated with this work allows to use between 5 and 20 years as  
363 length of the observation and prediction windows).

364 For the GAMs and GLMs, I estimated the optimal cutoff given equal weight to  
365 sensitivity (the probability that the model predicts extinction when the replicate went

366 extinct) and specificity (the probability that the model predicts persistence when the  
367 replicate persisted). Then, I tested the model by predicting population extinction and  
368 persistence on the test dataset using the computed optimal cutoff. For the classification  
369 RF models, I directly used the binary prediction (population going extinct or surviving)  
370 from the models. I used different modeling approaches because I did not explicitly model  
371 any mechanism or process that can be hypothesized to lead to extinction (i.e., models are  
372 correlative and not mechanistic), and different modeling approaches can give different  
373 insights on how contemporary extinctions are predicted (e.g., tree-based models like RFs  
374 provide a measure of variable importance for predicting the target variable (Breiman  
375 2001a) and GAMs can model non-linear relationships between predictors and target  
376 variable using semi-parametric estimation). For the GAMs and GLMs, I centered and  
377 scaled the predictors in order to compare their importance (Schielezeth 2010). As I use  
378 realistic variable ranges representing the variability that may be observed in nature, some  
379 of the estimated parameters can be compared in terms of effects on a standardized scale. I  
380 also fitted the same models using non-standardized predictors to test for possible data  
381 leakage between training and testing data sets (results were directionally the same). I did  
382 not include interactions among predictors in the models in order to improve the  
383 interpretability of results. I visually checked residuals for violation of model assumptions.

### 384 **3 Results**

385 Results are fully reproducible. Data and R code are at  
386 [https://github.com/simonevincenzi/Contemporary\\_Extinction](https://github.com/simonevincenzi/Contemporary_Extinction).

387 After year 100, the directional trend, the increase in variability of climate, and the  
388 increased occurrence and severity of point extremes led to noticeable fluctuations in  
389 population size over time (Fig. 1). Twenty-one per cent of the 34 560 simulation  
390 replicates went extinct. As expected, risk of extinction increased with higher frequency  
391 and severity of point extreme events, older age at first reproduction, and fewer offspring  
392 produced per mating pair (Fig. 2). Given an expected yearly number of offspring per  
393 mating pair, the proportion of replicates that went extinct increased approximately  
394 linearly with age at first reproduction (Fig. 2a). When considering all replicates or only  
395 the most extreme scenario, for a fixed expected number of offspring produced per mating  
396 pair, increasing age at first reproduction by one year would increase the probability of  
397 going extinct by approximately 10% (Fig. 2a). The combination of relative high  
398 frequency and high severity of extreme events led to a noticeably higher proportion of  
399 replicates that went extinct (Fig. 2b). Among the replicates that went extinct, 16% of  
400 them were not affected by a point extreme in the 10 years before extinction and 34% in  
401 the 5 years preceding extinction.

402 In populations that persisted until the end of simulation time, the GLM and GAM models  
403 that included  $n_{low}$  provided a good prediction of the total number of alleles at the end of  
404 simulation time (Table 2). The total number of years with population size smaller than  
405 150 individuals had a strong, negative non-linear effect on the total number of alleles at  
406 the end of simulation time (Fig. 3). Models that did not include  $n_{low}$  had much lower  
407 predictive performance (Table 2).

408 Models for differences in allelic frequency of more or less theoretically advantageous  
409 alleles were able to explain less than 5% of the variance of the target variable (Fig. 4).

410 The average value of population-mean phenotype  $\bar{z}$  in the last ten years of simulation  
411 time was negatively correlated with the difference in frequency of top and bottom 10% of  
412 alleles according to their allelic value at the end of simulation time ( $r = 0.71, p < 0.01$ ).

413 The GLM, GAM, and RF models fitted on the training data sets had similar high  
414 predictive accuracy and low false positive and negative rates when predicting extinction  
415 or survival in the 10-year “prediction window” (Table 3). For more than 98% of  
416 replicates included in the test data set, the GLM, GAM, and RF models provided the  
417 same prediction of either extinction or persistence (Fig. 5). In the GAM model, only  
418 minimum population size in the observation window had a strong non-linear (negative)  
419 effect on the log-odds of population extinction. Likewise, minimum population size was  
420 the most important predictor in the RF model (Fig. 6a). The models without minimum  
421 and mean population size as predictors had fairly low accuracy (Table 3). The RF model  
422 without minimum and mean population size as predictors found age at reproduction and  
423 expected yearly number of offspring per mating pair as the most important predictors of  
424 contemporary extinction (Fig. 6b).

#### 425 **4 Discussion**

426 Understanding and predicting the effects of extreme events on risk of extinction and  
427 population and genetic dynamics of natural populations is critical for both population  
428 forecasting and for managing human intervention in an increasingly more extreme world.

429 The results of the numerical simulations showed additive effects—with largely no  
430 interaction effects—between age at first reproduction and fecundity on risk of extinction  
431 for the range of values I simulated. In the replicates that survived up to the end of

432 simulation time, the total number of years in which the population was at a small size was  
433 a good predictor of allelic richness for the quantitative trait under selection. The  
434 population frequency of theoretically advantageous alleles was strongly correlated with  
435 the mean value of the phenotype under selection but was otherwise largely unpredictable.  
436 Last, simple models including basic demographic and vital rates information, along with  
437 climate and environmental data, provided excellent predictions of contemporary risk of  
438 population extinction.

#### 439 **4.1 Life histories**

440 Life-history theory predicts a prevalence of fast life histories in environments in which  
441 extreme events occur (Winemiller 2005). Fast life histories—usually defined as including  
442 a combination of faster body growth early in life, younger age at maturity, and higher  
443 reproductive effort early in the reproductive life of the individual—should allow for  
444 faster population growth rate after a drastic reduction in population size, an adaptive life-  
445 history strategy when the population is at risk of extinction.

446 For many animal species that frequently experience the often-catastrophic effects of  
447 extreme climate or point events—and have limited movement range for physiological and  
448 behavioral reasons or for the environment they inhabit (e.g., freshwater fish in mountain  
449 streams, insects)—offspring production is typically very high compared to the habitat  
450 carrying capacity. Thus, offspring production is not usually what is limiting population  
451 recovery, i.e. the re-establishment of the pre-event population size. However, when after  
452 a climate or point extreme event the population is reduced to such low numbers that the  
453 population is at immediate risk of extinction, younger age at first reproduction for the  
454 surviving individuals could be the life-history trait that makes the difference between

455 population persistence or extinction. Vincenzi et al. (2017) found that fish born after flash  
456 floods had younger mean age at reproduction than fish born before flash floods; they  
457 hypothesized that younger age at reproduction after flash floods was due to a  
458 combination of faster growth due to lower population density and fewer older fish  
459 competing for mates. However, younger age at sexual maturity and higher energetic  
460 investment in offspring production often come at the cost of shorter life expectancy (Fay  
461 et al. 2016), and life histories that are adaptive after population crashes can show lower  
462 fitness in steady-state conditions (Vincenzi et al. 2012, 2014).

#### 463 **4.2 Prediction of genetic dynamics and of population extinction**

464 Populations experiencing recurrent bottlenecks are expected to have their genetic pool  
465 eroded over time. The erosion of the genetic pool should be noticeable in particular in the  
466 loss of allelic richness, even after a single bottleneck event (Allendorf 1986). I found that  
467 the extent of population bottlenecks, which I operationalized as the number of years in  
468 which population size was relatively small with respect to the habitat carrying capacity  
469 and species numerical potential, was a strong predictor of allelic richness for the  
470 quantitative trait under selection in the simulations. These results appear to be partially  
471 consistent with recent empirical results. Vincenzi et al. (2017) found an increase in the  
472 proportion of fixed alleles in year-classes of two trout populations born after flash floods  
473 that caused massive mortalities. Poff et al. (2018) tested predictions about population  
474 genomic change in aquatic insects living in Colorado, US, mountain streams after a 1-in-  
475 500-year rainfall event. They found that allelic richness at presumably neutral loci  
476 declined after the event only in two out of six species analyzed. Moderate reduction of  
477 allelic diversity after strong bottlenecks might be attributable to the particular

478 demographic history of the populations that are investigated; according to Bouzat  
479 (2010), one can expect that populations experiencing recurrent bottlenecks might have  
480 had their genetic pool already eroded over time, which would decrease the effectiveness  
481 of both purifying selection and random allele loss. In addition, the loss of alleles could be  
482 greater in species—like salmonids—with high variance in reproductive success among  
483 adults (i.e., greater than Poisson variance in reproductive success), although high  
484 variance in reproductive success has been found to bias (i.e., make false positives more  
485 likely) empirical investigations of genetic bottlenecks (Hoban et al. 2013). Moreover, in  
486 the simulations of population dynamics, we started from 10 unique alleles for each of the  
487 10 loci, and the high initial allelic diversity may explain the strong relationship that was  
488 found between the temporal extent of bottlenecks and allelic richness.

489 On the other hand, a model including age at first reproduction and fecundity of the  
490 species, along with some traits of the environment, was not able to predict the dynamics  
491 of the population frequencies of more advantageous alleles for the quantitative trait under  
492 selection. However, a strong correlation was found between the frequencies of more or  
493 less advantageous alleles at the end of simulation time and the average value of the  
494 phenotype under selection. This result seems to at least suggest that, although the fate of  
495 alleles is difficult to predict from just the coarse-grain description of the environment and  
496 of the species, even in an extreme environment that also causes trait-independent mass  
497 mortalities, a shift in the phenotype is likely to be caused by the increased prevalence of  
498 the most advantageous alleles.

499 One of the foundational tenets of conservation biology is that small, fragmented  
500 populations should be considered locally vulnerable to extinction—even more critically

501 so when affected by highly variable climatic conditions and other environmental  
502 disturbances. The conditions that led to the extinction of a population or species can  
503 almost always be understood retrospectively, but forecasting extinction, especially over  
504 contemporary time horizons, is much more challenging. In this work, I found that the  
505 most important predictors of contemporary extinctions were mean and minimum  
506 population size measured in the few years before the “prediction window”. However, it  
507 was not uncommon for the simulated populations to swiftly rebound after collapses in  
508 numbers, and age at reproduction and yearly fecundity were the most important  
509 predictors of extinction when measures of population size were not included in the model.  
510 This result highlights the importance of age at first reproduction and yearly fecundity for  
511 population persistence in highly stochastic environments, as also suggested by theoretical  
512 (Bürger and Lynch 1995) and experimental (Griffen and Drake 2008) studies. However,  
513 other genetic challenges not accounted for in my simulation model are likely to be  
514 encountered by populations that decline to very small numbers, such as a reduction of  
515 viability and/or fecundity due to either inbreeding or the expression of deleterious alleles  
516 (Willi et al. 2006).

517 Although it may appear from the simulation results that vital rates and environmental  
518 conditions play a small role in models that predict contemporary risk of extinction, those  
519 rates and conditions heavily contribute to determining population size in the “observation  
520 window”; for example, populations with higher fecundity and younger age at first  
521 reproduction are less likely to remain at low population sizes than populations with lower  
522 fecundity and delayed sexual maturity. Likewise, a more extreme environment (e.g.,  
523 greater selection strength and more frequent and/or severe climate and point extremes)



524 tends to decrease average population size, either due to acute events that kill individuals  
525 or constant recovery from population crashes.

526 Luck also plays a major role in determining whether a population will recover after a  
527 population crash. Vincenzi et al. (2017) found that the almost-complete recovery of a  
528 trout population that was reduced to a handful of individuals after a flash flood was due  
529 to the large production of offspring by a single mating pair. Considering the high  
530 variance in adult reproductive success in trout populations—which is at least partially due  
531 to differences in individual “quality” (Auld et al. 2019)—had the mating pair been killed  
532 or displaced during the flash flood, population recovery would have suddenly become  
533 much less likely.

### 534 **4.3 Modeling considerations**

535 Modeling and simulation approaches can help understand the effects of multiple  
536 extreme stressors on the contemporary risk of extinction of species and can be used to  
537 guide or support both the set-up of ecologically relevant experimental designs and the  
538 interpretation of biological responses to multiple stressors.

539 However, models of population and genetic dynamics are limited in their scope of  
540 prediction by both the understanding of the biology and ecology of the species and the  
541 availability of data to parametrize, train, and test models, along with modeling choices  
542 (e.g., explicit or implicit modeling of alleles, clustered or “well-mixed” individuals or  
543 populations). Although often intuitive, it is nevertheless important to remind ourselves  
544 that the simulation results of modeling exercises depend on, first, our biological and  
545 ecological understanding, and, second, the simplified modeling of the species and the  
546 environment they inhabit. For instance, general trade-offs between allocation of resources

547 to competing physiological functions are not only often intrinsically challenging to  
548 model, but they may also vary over time and space for the same species or population.  
549 That is, even when there is a qualitative understanding of biological or ecological  
550 processes, the parameterization and choice of parameter values for the model may be too  
551 uncertain to provide actionable predictions.

552 Trade-offs between model accuracy and interpretability also need to be taken into  
553 account when developing models of population and genetic dynamics. Accuracy  
554 describes the ability of a model to explain observed data and make correct predictions,  
555 while interpretability concerns to what degree the model allows for understanding  
556 processes. Often, there is a trade-off between accuracy and interpretability: more  
557 complex models are usually opaque, while more interpretable models often do not  
558 provide the same accuracy or predictive power of more complex models (Breiman  
559 2001b). Then, although intuitively more complex models are expected to provide more  
560 accurate predictions of risk of extinction or population and genetic dynamics, this is not  
561 always the case. For instance, Ward et al. (2014) tested the predictive performance of  
562 short-term forecasting models of population abundance of varying complexity. They  
563 found that more complex models often performed worse than simpler models, which  
564 simply treated the most recent observation as the forecast. In their case, the estimation of  
565 even a small number of parameters imposed a high cost while providing little benefit for  
566 short-term forecasting of population abundance. However, when there was a clear signal  
567 of cyclic dynamics, more complex models were able to more accurately predict future  
568 population sizes.

569 As always, the purpose of a scientific investigation should drive model formulation,

570 the type and amount of data collected, and the acceptable uncertainty of model

571 predictions.

572

573 **Ethics**

574 Not applicable

575 **Data accessibility**

576 Data and relevant code for this research work are stored in GitHub:

577 [https://github.com/simonevincenzi/Contemporary\\_Extinction](https://github.com/simonevincenzi/Contemporary_Extinction)

578 **Authors' Contributions**

579 Simone Vincenzi conceived the ideas, designed the methods, run the analyses, and

580 wrote the manuscript.

581 **Competing interests**

582 The author declares no competing interests

583 **Funding**

584 Not applicable

585 **Acknowledgements**

586 Simone Vincenzi developed the idea behind this work while walking the Malecón of  
587 La Habana, Cuba, and finished writing the manuscript after the 2020 California fires that  
588 imperiled the town where he resides (Santa Cruz, CA, US) and the COVID-19 pandemic  
589 highlighted the importance of proper simulation modeling for basic science and policy,  
590 and the increasing threat of extreme events for people and nature.

591

592 **References**

- 593 Allendorf, F. W. 1986. Genetic drift and the loss of alleles versus heterozygosity. - Zoo  
594 Biol. 5: 181–190.
- 595 Auld, H. L. et al. 2019. Advancing mate choice studies in salmonids. - Rev. Fish Biol.  
596 Fish. 29: 249–276.
- 597 Bailey, L. D. and van de Pol, M. 2016. Tackling extremes: Challenges for ecological and  
598 evolutionary research on extreme climatic events. - J. Anim. Ecol. 85: 85–96.
- 599 Bell, G. and Gonzalez, A. 2009. Evolutionary rescue can prevent extinction following  
600 environmental change. - Ecol. Lett. 12: 942–8.
- 601 Bouzat, J. L. 2010. Conservation genetics of population bottlenecks: The role of chance,  
602 selection, and history. - Conserv. Genet. 11: 463–478.
- 603 Breiman, L. 2001a. Random Forests. - Mach. Learn. 45: 5–32.
- 604 Breiman, L. 2001b. Statistical modeling: The two cultures. - Stat. Sci. 16: 199–231.
- 605 Brown, J. H. and Kodric-Brown, A. 1977. Turnover rates in insular biogeography: effect  
606 of Immigration on extinction. - Ecology 58: 445–449.
- 607 Bryant, E. H. and Meffert, L. M. 1995. An analysis of selectional response in relation to a  
608 population bottleneck. - Evolution. 49: 626.
- 609 Bürger, R. and Lynch, M. 1995. Evolution and extinction in a changing environment: a  
610 quantitative-genetic analysis. - Evolution. 49: 151–163.
- 611 Carlson, S. M. et al. 2014. Evolutionary rescue in a changing world. - Trends Ecol. Evol.  
612 29: 521–530.
- 613 Endler, J. A. 1986. Natural Selection in the Wild. - Princeton University Press.
- 614 Falconer, D. S. and Mackay, T. F. C. 1996. Introduction to Quantitative Genetics. -

- 615        Prentice Hall.
- 616    Fay, R. et al. 2016. Variation in the age of first reproduction: different strategies or  
617        individual quality? - *Ecology* 97: 1842–1851.
- 618    Frankham, R. et al. 2014. Genetics in conservation management: Revised  
619        recommendations for the 50/500 rules, Red List criteria and population viability  
620        analyses. - *Biol. Conserv.* 170: 56–63.
- 621    Griffen, B. D. and Drake, J. M. 2008. A review of extinction in experimental populations.  
622        - *J. Anim. Ecol.* 77: 1274–87.
- 623    Gutschick, V. P. and BassiriRad, H. 2010. Biological extreme events: a research  
624        framework. - *Eos.* 91: 85–91.
- 625    Hoban, S. M. et al. 2013. High variance in reproductive success generates a false  
626        signature of a genetic bottleneck in populations of constant size: A simulation study.  
627        - *BMC Bioinformatics* 14: 309.
- 628    IPCC 2007. *Climate Change 2007. Synthesis Report. Contribution of Working Groups I,*  
629        *II & III to the Fourth Assessment Report of the Intergovernmental Panel on Climate*  
630        *Change.*
- 631    IPCC 2012. *Summary for policymakers.* - In: Field, C. B. et al. (eds), *Managing the Risks*  
632        *of Extreme Events and Disasters to Advance Climate Change Adaptation.*  
633        Cambridge University Press, pp. 1–19.
- 634    Janža, M. 2013. Impact assessment of projected climate change on the hydrological  
635        regime in the SE Alps, Upper Soča River basin, Slovenia. - *Nat. Hazards* 67: 1025–  
636        1043.
- 637    Jentsch, A. et al. 2007. A new generation of climate change experiments: events, not

- 638 trends. - *Front. Ecol. Environ.* 6: 315–324.
- 639 Kingsolver, J. G. et al. 2001. The strength of phenotypic selection in natural populations.  
640 - *Am. Nat.* 157: 245–61.
- 641 Kirkpatrick, M. and Jarne, P. 2000. The effects of a bottleneck on inbreeding depression  
642 and the genetic load. - *Am. Nat.* 155: 154–167.
- 643 Lande, R. 1995. Mutation and conservation. - *Conserv. Biol.* 9: 782–791.
- 644 Lynch, M. and Walsh, B. 1998. Genetic and analysis of quantitative traits. - Sinauer.
- 645 Lytle, D. A. 2000. Biotic and abiotic effects of flash flooding in a montane desert stream.  
646 - *Arch. fur Hydrobiol.* 150: 85–100.
- 647 Lytle, D. A. and Poff, N. L. 2004. Adaptation to natural flow regimes. - *Trends Ecol.*  
648 *Evol.* 19: 94–100.
- 649 Mangel, M. and Tier, C. 1993. A simple direct method for finding persistence times of  
650 populations and application to conservation problems. - *Proc. Natl. Acad. Sci. U. S.*  
651 *A.* 90: 1083–1086.
- 652 McCullagh, P. and Nelder, J. A. 1989. *Generalized Linear Models.* - Chapman &  
653 Hall/CRC.
- 654 Poff, N. L. R. et al. 2018. Extreme streams: species persistence and genomic change in  
655 montane insect populations across a flooding gradient. - *Ecol. Lett.* 21: 525–535.
- 656 Reznick, D. et al. 2002. r- and K-selection revisited: The role of population regulation in  
657 life-history evolution. - *Ecology* 83: 1509.
- 658 Schielzeth, H. 2010. Simple means to improve the interpretability of regression  
659 coefficients. - *Methods Ecol. Evol.* 1: 103–113.
- 660 The One Earth Editorial Team. 2020. Shocks to the System. - *One Earth* 2: 487–488.

- 661 van de Pol, M. et al. 2017. Behavioural, ecological and evolutionary responses to extreme  
662 climatic events: challenges and directions. - *Philos. Trans. R. Soc. B Biol. Sci.* 372:  
663 20160134.
- 664 Vincenzi, S. 2014. Extinction risk and eco-evolutionary dynamics in a variable  
665 environment with increasing frequency of extreme events. - *J. R. Soc. Interface* 11:  
666 20140441.
- 667 Vincenzi, S. et al. 2012. Selective consequences of catastrophes for growth rates in a  
668 stream-dwelling salmonid. - *Oecologia* 168: 393–404.
- 669 Vincenzi, S. et al. 2014. Eco-evolutionary dynamics induced by massive mortality events.  
670 - *J. Fish Biol.* 85: 8–30.
- 671 Vincenzi, S. et al. 2016. Within and among-population variation in vital rates and  
672 population dynamics in a variable environment. - *Ecol. Appl.* 26: 2086–2102.
- 673 Vincenzi, S. et al. 2017. Genetic and life-history consequences of extreme climate events.  
674 - *Proc. R. Soc. B Biol. Sci.* 284: 20162118.
- 675 Ward, E. J. et al. 2014. Complexity is costly: a meta-analysis of parametric and non-  
676 parametric methods for short-term population forecasting. - *Oikos* 123: 652–661.
- 677 White, E. R. 2019. Minimum time required to detect population trends: the need for long-  
678 term monitoring programs. - *Bioscience* 69: 26–39.
- 679 Willi, Y. and Hoffmann, A. A. 2009. Demographic factors and genetic variation  
680 influence population persistence under environmental change. - *J. Evol. Biol.* 22:  
681 124–33.
- 682 Willi, Y. et al. 2006. Limits to the adaptive potential of small populations. - *Annu. Rev.*  
683 *Ecol. Evol. Syst.* 37: 433–458.



- 684 Winemiller, K. O. 2005. Life history strategies, population regulation, and implications  
685 for fisheries management. - *Can. J. Fish. Aquat. Sci.* 885: 872–885.
- 686 Wood, S. 2006. *Generalized additive models: an introduction with R.* - Chapman & Hall.
- 687 Zhang, X. 2012. Fisher' s geometrical model of fitness landscape and variance in fitness.  
688 - *Evolution.* 66: 2350–68.
- 689
- 690

691 **Tables**

692

693 **Table 1.** Values of parameters of the model of population and genetic dynamics.

694

| Parameters   | Values               | Description                                                                                                        |
|--------------|----------------------|--------------------------------------------------------------------------------------------------------------------|
| $K$          | 500                  | Population ceiling                                                                                                 |
| $\lambda_o$  | 1.0, 1.5, 2.0, 2.5   | Intensity of the Poisson distribution of yearly number of offspring per mating pair                                |
| $a_f$        | 1, 2, 3, ,4          | Age at first reproduction                                                                                          |
| $t_{ch}$     | 100                  | Years since the start of the simulation before climate change                                                      |
| $t_{inc}$    | 25                   | Time of increase of variability (variance of the normal distribution of the climate variable) after climate change |
| $n_l$        | 10                   | Number of diploid loci                                                                                             |
| $\sigma_A^2$ | $6.25 \cdot 10^{-3}$ | Additive genetic variance per locus at the start of simulation                                                     |
| $\sigma_a^2$ | $2.5 \cdot 10^3$     | Variance of the normal distribution of allelic values                                                              |
| $\sigma_G^2$ | 0.2                  | Additive genetic variance of the quantitative trait at the start of simulation                                     |
| $\mu_E$      | 0                    | Mean environmental effect                                                                                          |

---

|                         |                    |                                                                                                                                                |
|-------------------------|--------------------|------------------------------------------------------------------------------------------------------------------------------------------------|
| $\sigma_E^2$            | 1                  | Environmental variance                                                                                                                         |
| $m_E$                   | 0.3, 0.5, 07       | Mortality caused by the point extreme event                                                                                                    |
| $s$                     | 8, 11 $10^{-2}$    | Strength of selection                                                                                                                          |
| $p(E_b)$                | $5 \cdot 10^{-2}$  | Probability of occurrence of point extreme events before climate change                                                                        |
| $p(E_a)$                | 5, 10,15 $10^{-2}$ | Probability of occurrence of point extreme events after climate change                                                                         |
| $\mu_{\theta,0}$        | 0                  | Mean of the normal distribution of the phenotypic optimum from year 1 to $t_{ch}$                                                              |
| $\sigma_{\theta,0}$     | 1                  | Standard deviation of the normal distribution of the phenotypic optimum from year 1 to $t_{ch}$                                                |
| $\beta_{\mu,\theta}$    | 0, 1.5 $10^{-2}$   | Annual increase (directional trend) of the mean of the normal distribution of the climate variable from year $t_{ch}$ to the end of simulation |
| $\beta_{\sigma,\theta}$ | 0,1,1.5 $10^{-2}$  | Annual increase of the standard deviation of the normal distribution of the climate variable from year $t_{ch}$ to $t_{ch} + t_{inc}$          |

---

695

696

697 **Table 2.** Performance of Ordinary Least-Squares regression models (OLS),  
698 Generalized Additive Models (GAM) and Random Forest models (RF) when predicting  
699 the total number of alleles at the end of simulation time for the replicates that did not go  
700 extinct. All populations started with 10 alleles for each of the 10 loci for a total of 100  
701 unique alleles. Full models include as predictors  $n\_low$ ,  $\beta_{\sigma,\theta}$ ,  $\beta_{\mu,\theta}$ ,  $p(E_a)$ ,  $m_E$ ,  $a_t$ ,  
702  $\lambda_o$ , and  $s$ .  $n\_low$  is the number of years the population was below 150 individuals and all  
703 other symbols are as in Table 1 (results were similar with  $tr\_low = 100$  or 50 and are  
704 reported in the computer code associated with this paper). The training data set had  
705 21 523 replicates (80% of the replicates that survived up to the end of simulation time)  
706 and the test data set had 5 371 replicates.  $R^2$  was calculated with respect to the 1:1  
707 predicted-observed line;  $MAE$  is the mean absolute error calculated over the whole test  
708 data set. Over the entire data set (training and test), the number of alleles at the end of  
709 simulation time was [mean  $\pm$  sd]  $79.84 \pm 21.11$ .

710

711

712

713

714

715

| <i>Model</i>    | $R^2$ | <i>MAE</i> |
|-----------------|-------|------------|
| <i>RF_full</i>  | 0.82  | 6.6        |
| <i>RF_red</i>   | 0.24  | 15.0       |
| <i>GAM_full</i> | 0.78  | 7.8        |
| <i>OLS_full</i> | 0.71  | 8.8        |
| <i>OLS_red</i>  | 0.22  | 15.2       |

716 **Table 3.** Generalized Linear Model with logit link function for prediction of extinction  
717 (1)/persistence (0) of a population over a 10-year period (“prediction window”) with  
718 predictors minimum population size  $\min(N)$ , mean population size  $\bar{N}$ , maximum value of  
719 the optimum phenotype  $\max(\Theta)$ , maximum and minimum mean population-level  
720 maladaptation (or “extremeness” of the climate extreme)  $\max(\Theta(t) - z(t))$  and  
721  $\text{mean}(\Theta(t) - z(t))$ , and occurrence of a point extreme  $E$ , all measured in the 10 years before  
722 the start of the “prediction window” (i.e., in the “observation window”), along with  
723 selection strength  $s$ , age at first reproduction  $a_f$  and expected yearly number of offspring  
724 per pair  $\lambda_0$  (*full* model). In the *reduced* model, I excluded  $\min(N)$  and  $\bar{N}$ . All predictors  
725 were standardized ( $s$  and  $E$  are categorical variables with two levels each and they were  
726 not standardized) and I report mean estimate and standard error of the regression  
727 coefficients for the GLM models (estimate, standard errors and significance where  
728 applicable for the GAM and RF models are in the computer code associated with this  
729 paper). The GLM, GAM, and RF models were trained on 39 547 replicates (36% went  
730 extinct) and tested on 4 600 replicates (50% went extinct). For the full and reduced GLM  
731 models, when using the optimal cutoffs (*full* = 0.54, *reduced* = 0.35), accuracy when  
732 tested on the validation data set was 97% for the *full* model and 77% for the *reduced*  
733 model, false positive rate 0.03 and 0.26, false negative rate 0.03 and 0.19. For the GAM  
734 models (details in computer code associated with this article), optimal cutoffs were 0.38  
735 for the *full* model and 0.35 for the *reduced* model, accuracy 97% and 77%, false positive  
736 rate 0.03 and 0.25, false negative rate 0.03 and 0.20. For the RF models, accuracy when  
737 tested on the test data set was 97% for the *full* model and 72% for the *reduced* model,  
738 false positive rate 0.02 and 0.16, false negative rate 0.04 and 0.38.

739

740

741

|                                 | <i>full</i> | <i>reduced</i> |
|---------------------------------|-------------|----------------|
| <i>Intercept</i>                | -5.63(0.14) | -2.39(0.03)    |
| $\min(N)$                       | -5.41(0.20) | -              |
| $\bar{N}$                       | -1.34(0.10) | -              |
| $S$                             | 0.62(0.06)  | 1.02(0.03)     |
| $\max(\Theta)$                  | -0.14(0.04) | -0.11(0.02)    |
| $\lambda_0$                     | -0.42(0.03) | -0.89(0.01)    |
| $a_f$                           | 0.42(0.03)  | 0.80(0.01)     |
| $E$                             | 0.64(0.07)  | 1.50(0.03)     |
| $\max(\Theta(t) - z(t))$        | 0.06(0.05)  | 0.28(0.02)     |
| $\text{mean}(\Theta(t) - z(t))$ | 0.13(0.04)  | 0.62(0.03)     |

## 742 **Figure captions**

743 **Figure 1.** Examples of simulation replicates. The black solid line and black points  
744 represent population size, circles are point extremes, the gray dashed line is the value of  
745 the optimum phenotype  $\Theta$ , and the solid gray line is the mean phenotype  $\bar{z}$  in the  
746 population. Both  $\Theta$  and  $\bar{z}$  are re-scaled for graphical purposes. Parameters for the  
747 simulation in panel (a):  $\beta_{\sigma,\Theta} = 0$ ,  $\beta_{\mu,\Theta} = 15 \cdot 10^{-2}$ ,  $p(E_a) = 10 \cdot 10^{-2}$ ,  $m_E = 0.7$ ,  $a_f = 4$ ,  $\lambda_0 = 2$ ,  
748  $s = 11 \cdot 10^{-2}$ . (b):  $\beta_{\sigma,\Theta} = 15 \cdot 10^{-2}$ ,  $\beta_{\mu,\Theta} = 15 \cdot 10^{-2}$ ,  $p(E_a) = 15 \cdot 10^{-2}$ ,  $m_E = 0.3$ ,  $a_f = 3$ ,  $\lambda_0 = 2$ ,  $s$   
749  $= 8 \cdot 10^{-2}$ . (c):  $\beta_{\sigma,\Theta} = 15 \cdot 10^{-2}$ ,  $\beta_{\mu,\Theta} = 0$ ,  $p(E_a) = 15 \cdot 10^{-2}$ ,  $m_E = 0.5$ ,  $a_f = 3$ ,  $\lambda_0 = 1$ ,  $s = 8 \cdot 10^{-2}$ .  
750 In the simulation in panel (c), the population went extinct at year 184. Symbols are as in  
751 Table 1.

752 **Figure 2.** Extinction probability (number of populations going extinct divided by the  
753 number of replicates run for a given set of parameter values) for scenarios of: (a)  
754 different ages at first reproduction and expected yearly number of offspring per mating  
755 pair (solid line: all replicates; dashed line = most extreme environment, i.e.,  $p(E_a) = 15$   
756  $\cdot 10^{-2}$ ,  $m(E_a) = 0.7$ ,  $\beta_{\mu,\Theta} = 5 \cdot 10^{-2}$ ,  $\beta_{\sigma,\Theta} = 1.5 \cdot 10^{-2}$ ); (b) different probability of point  
757 extremes and probability of dying from point extremes.

758 **Figure 3.** Partial non-linear effect of the total number of years in which the population  
759 is below 150 individuals during simulation time ( $n_{low}$ ) on the total number of alleles at  
760 the end of simulation time, as found from the Generalized Additive Model of Table 2.  
761 The GAM algorithm found  $k = 3$  as the optimal number of degrees of freedom for the  
762 spline (i.e., a cubic). Model details and results are in the in the computer code associated  
763 with this paper.

764 **Figure 4.** Panels (a-b): population dynamics of two simulation replicates (details  
765 about the replicates are in the computer code associated with this paper). Lines and  
766 symbols are as in Figure 1. Panels (c-d) dynamics of allelic frequency for the populations  
767 in panels (a-b) (a→c, b→d). Thin dashed gray lines represent the allelic frequencies  
768 measured every 50 years for alleles in the bottom 10% of allelic values (for (c):  $n = 10$ ,  
769 allelic value [mean  $\pm$  sd] =  $-0.27 \pm 0.08$ ; (d)  $n = 10$ , allelic value =  $-0.21 \pm 0.04$ ) and thin  
770 solid black lines represent the top 10% (for (c):  $n = 10$ , allelic value =  $0.28 \pm 0.08$ ; (d)  
771  $0.25 \pm 0.06$ ). Thick dashed gray lines represent the average frequency in the population  
772 of alleles in the bottom 10% of allelic values and thick solid black lines represent the  
773 average frequency of the top 10%. In (c), the alleles in the bottom 10% of allelic values  
774 were more frequent in the population at the end of simulation time than alleles in the top  
775 10%, and *vice versa* in panel (d).

776 **Figure 5.** Examples of Generalized Linear Model (GLM), Generalized Additive  
777 Model (GAM), and Random Forest (RF) predictions of extinction in a “prediction  
778 window” based on climate and population traits observed in a “observation window”.  
779 Circles are point extremes, the black solid line and black points represent population size,  
780 the gray dashed line is the optimum phenotype re-scaled for graphical purposes. The  
781 letter O denotes the “observation window” and P the “prediction window”. For each  
782 model in the legend, 1 means the model predicted extinction (e.g., RF = 1 means that the  
783 RF model predicted extinction) and 0 otherwise; in panel (d), all models predicted  
784 extinction, but the replicate did not go extinct. In panel (a) only the RF model predicted  
785 extinction and the replicate went extinct, in (b) only the GLM model predicted extinction



786 and the replicate went extinct, and in (c) only the GAM model predicted extinction and  
787 the replicate did not go extinct.

788 **Figure 6.** Variable importance for the full (panel (a)) and reduced (i.e., without  
789  $\min(N)$  and  $\bar{N}$ , panel (b)) Random Forest models for prediction of extinction in the 10-  
790 year “prediction window” based on climate/environmental and population traits measured  
791 in the 10-year “observation window”. To compute variable importance, for each tree, the  
792 prediction accuracy on the out-of-bag portion of the data is recorded, and the same is  
793 done after permuting each predictor. The difference between the two accuracies are then  
794 averaged over all trees and normalized by the standard error. The most important  
795 predictor is assigned the value of 100 and the other predictors are scaled accordingly.

796 **Figure 1**

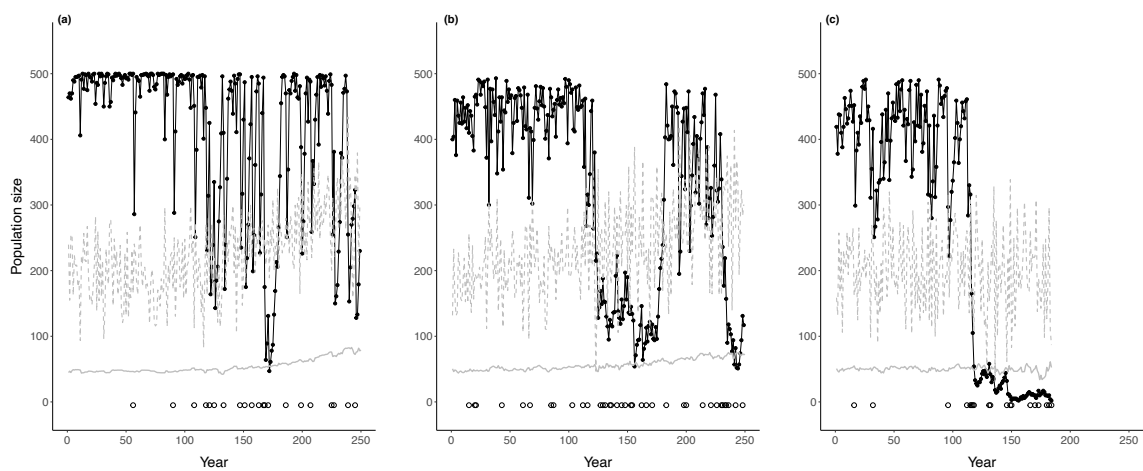

797

## Figure 2

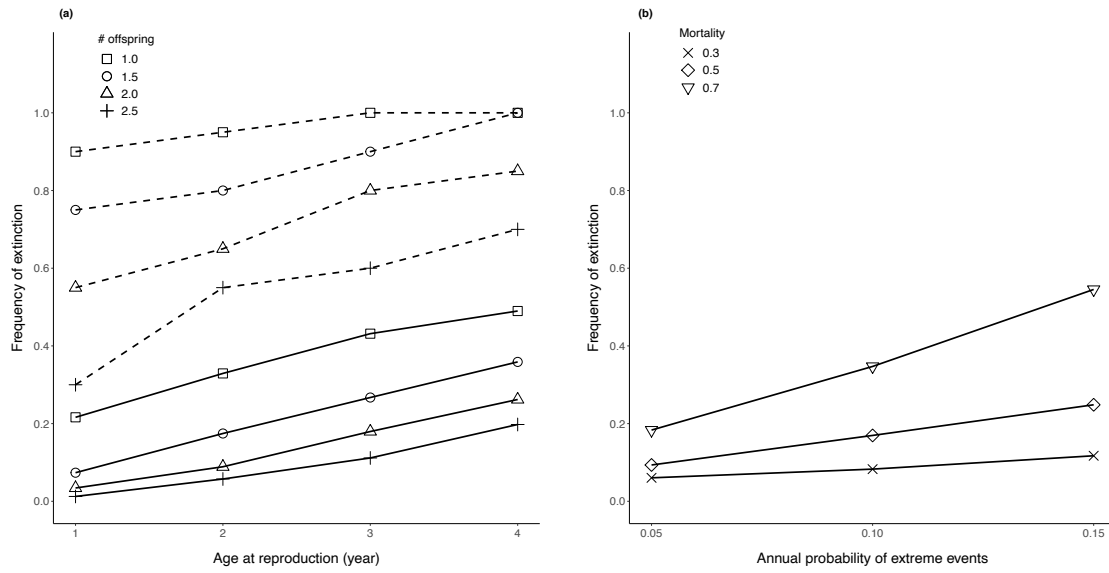

798 **Figure 3**

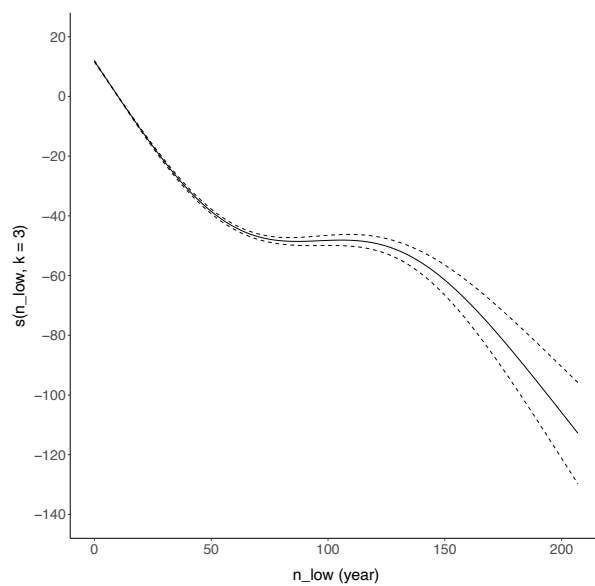

799 **Figure 4**

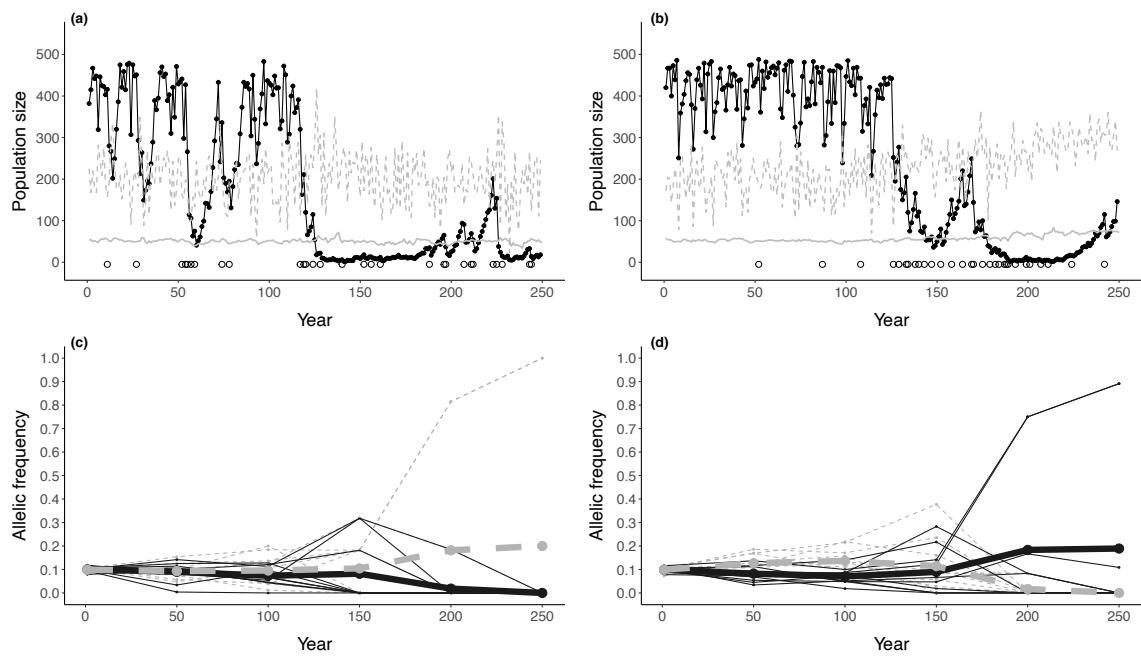

800 **Figure 5**

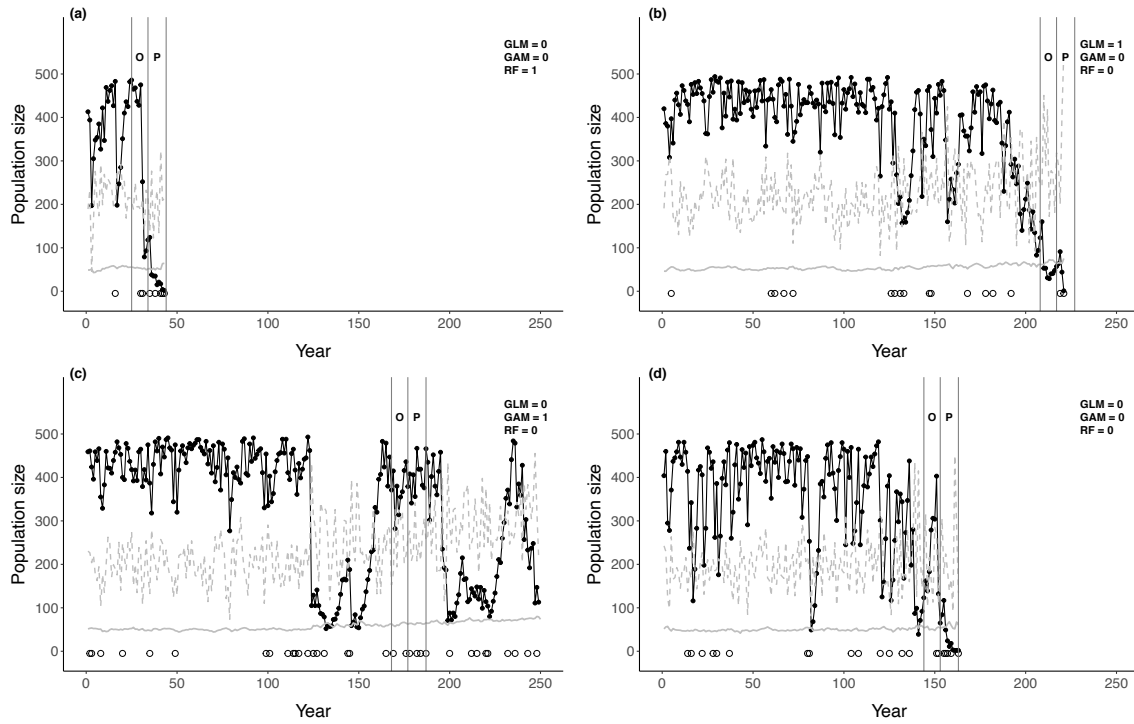

801 **Figure 6**

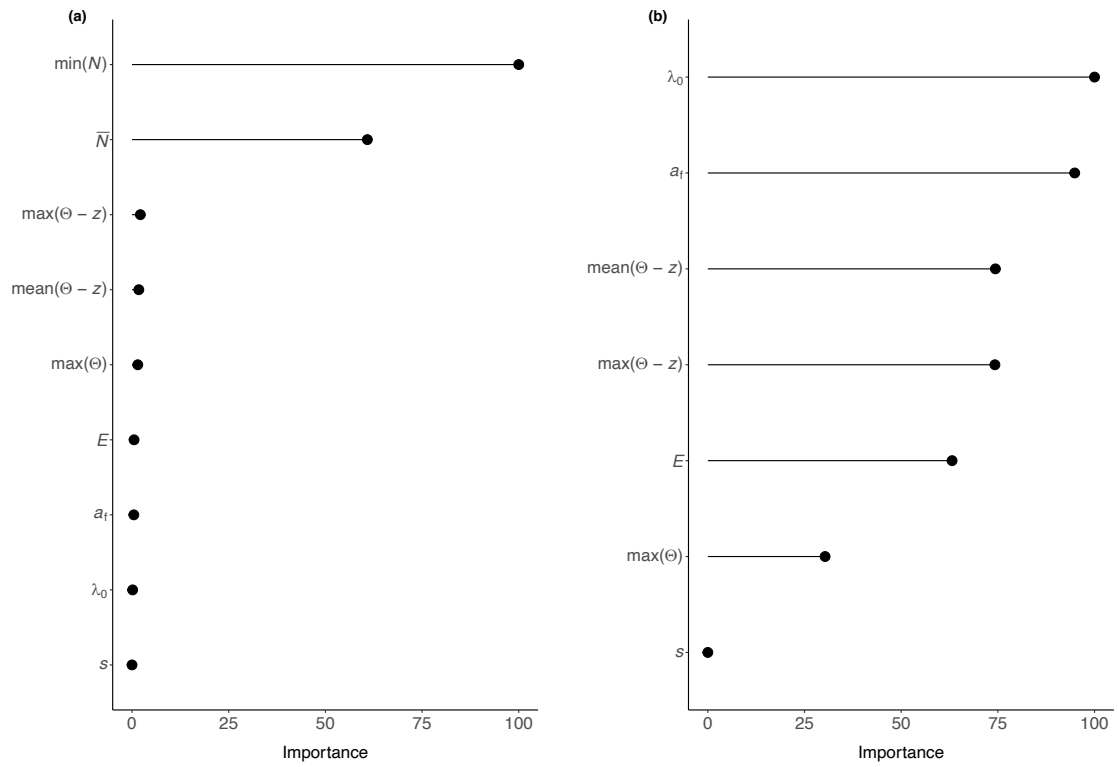

Source: https://www.biorxiv.org/content/10.1101/2020.09.15.298919v2.full.pdf
